# Supplementary material
Source: publisher site journal article supplement (https://www.dovepress.com/article/564975)
Supplement: Supplementary file 1 [file 564975%20Supplementary%20Material.docx]

**Supplementary Table 1. Positionality statements of manuscript contributors**

| Niloofar Gheshlaghi | I am a cisgender woman, and medical student at the University of Calgary. |
| --- | --- |
| Kimi Manhas | I am a woman of colour, and a Provincial Lead in Cardiac Services British Columbia at PHSA. |
| Megan Thomas | I am a cisgender woman of colour, and graduate student researcher in epidemiology and health equity. |
| Mary De Vera | I am a woman of colour, and epidemiologist. |

**Supplementary Table 2. Interview guide.**

| Introduction | - Ask if they have read the consent form attached to the email, and if they have any questions. If they have not read it, ask them to please read it prior to starting interview. - The goal of this study is to gain perspective on the staff experiences in supporting and managing patients facing cost-related non-adherence (CRNA) as there are no reports on these experiences. - Tell participant that they will be asked a series of questions to discuss their experience and perceptions of CRNA. Remind participant that the interview will be recorded. Remind participant that answers will be used for research, and their names and data collected from the interview will be anonymized. - Ask permission to begin recording. I will start recording now. |
| --- | --- |
| Question 1 | Could you tell me about yourself including:   - 1. Your affiliation (e.g., unit, department, institution, site)   2. Your occupation and training |
| Question 2 | Can you tell me more about your current position/role?  Prompts: What is your specialty? What setting do you work in (ex. inpatient or outpatient unit)? At what point in a patient’s visit do you interact with them? Do you prescribe medications? What do you enjoy? What are some struggles? |
| Question 3 | Have you heard of the issue of Cost Related Non-adherence OR CRNA (as I will refer to it during the interview)?  If yes: how would you describe it? Where did you hear the term? Have you received any formal education or training on the topic? Could you give some general examples? Is this something you discuss with colleagues? Is this something you encounter in your position/role?  If no: Cost Related Non-Adherence encompasses a set of patient behaviors where patients skip doses, split doses, or never pick up their prescriptions due to medication costs. With this definition, could you reflect and think of what it means to you? Do you use a different term for CRNA in your practice? Could you think of some general examples? Have you received any formal education or training on the topic (under a different name)? |
| Question 4 | Let’s start at a more granular look at CRNA in your work. Can you think of any specific cases of CRNA that stand out to you?  If yes: without revealing too much, could you tell me about the case? What was/were the patients’ demographic characteristics? Why does it stand out? What did you do in that situation? Were there any supports/barriers? How did those experiences make you feel?  If no: Is there a reason why none stand out? Without revealing too much could you describe who tends to experience CRNA, can you tell us about them (setting, what kind of medical coverage they have, is there a specific population that’s struggling more vs another) |
| Question 5 | I would like to know expand our look at CRNA in your work more broadly. Can you describe to what extent CRNA is occurring among patients you see?  Prompt: How often / What proportion of patients do you see CRNA in? How does CRNA in your patients impact your day-to-day workflow? How does dealing with CRNA in your patients add to your workload? What is causing this increased time investment? |
| Question 6 | Do you speak to patients regarding the cost of medications?  If yes: How do you determine which patients to ask, how do you typically approach these conversations? What are the challenges with starting these conversations? What is the general patient response? Who tends to start the conversation (you or the patient)?  If no: Thank you for your honesty. Why? What prevented you from doing so? What are the  restrictions? |
| Question 7 | **If they are a prescriber**  When you’re writing a prescription, what are the circumstances that make you think of the cost of the medications? |
| Question 8 | What are resources and supports you are familiar with respect to CRNA?  Where did you learn about them? When do you provide them? How often do you provide resources? Are you being provided with the proper tools to support patients? Is what you have access to sufficient? |
| Question 9 | Are there other ways you think we could address CRNA?  What are some supports you would like to see? What level do you think would benefit the most from additional supports? |
| Question 10 | Is there anything that you would like to add from what we’ve talked about today or anything that comes to mind on a topic that we haven’t discussed? |
